# Supplementary material for: Enhancing the energy barrier of dysprosium(iii) single-molecule magnets by tuning the magnetic interactions through different N-oxide bridging ligands
Source: Royal Society of Chemistry journal article supplement (doi:10.1039/c9ce01378d), 2019-01-01
Supplement: c9ce01378d1.pdf [file c9ce01378d1.pdf]

## Enhancing Energy Barrier of Dysprosium(III) Single-Molecule Magnets by Tuning Magnetic Interactions through Different *N*-oxide Bridging Ligands

Juan Wang, Mingfang Yang, Juan Sun, Hui Li, Jinjin Liu, Qinglun Wang, Licun Li, Yue Ma,\* Bin Zhao,\* and Peng Cheng

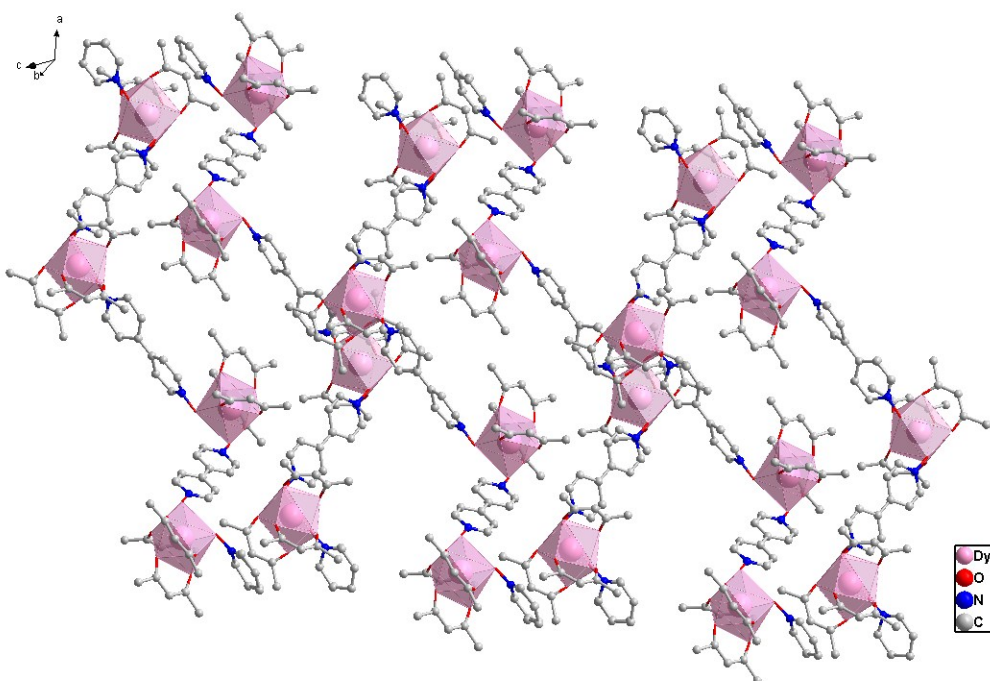

**Figure S1.** Packing diagram of complex **1**, all fluorine and hydrogen atoms are omitted for clarity.

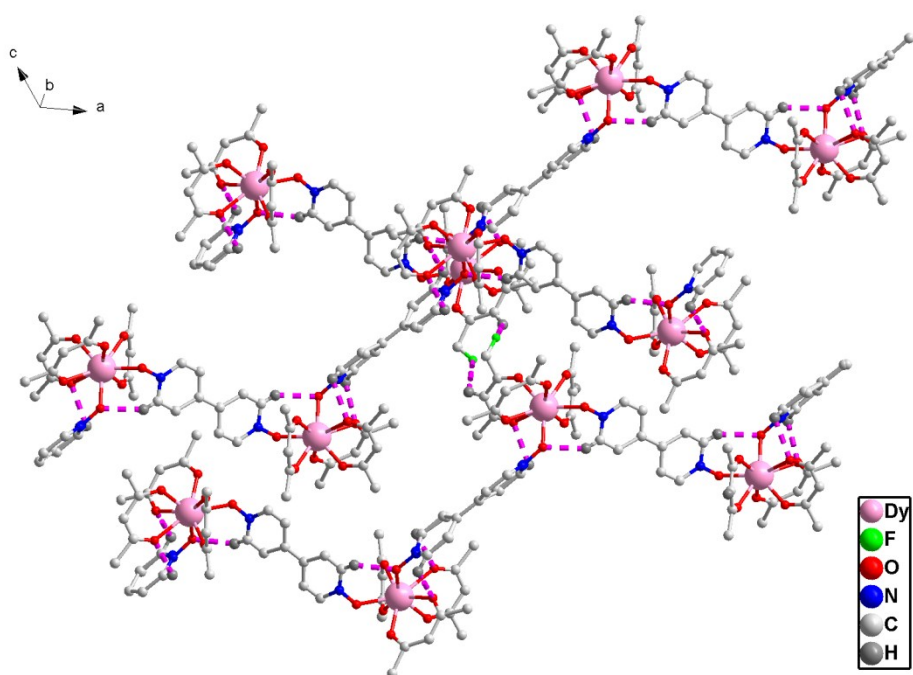

**Figure S2.** Hydrogen bonding interactions in complex **1** support the formation of three-dimensional networks arrangement, some hydrogen and fluorine atoms are omitted for clarity.

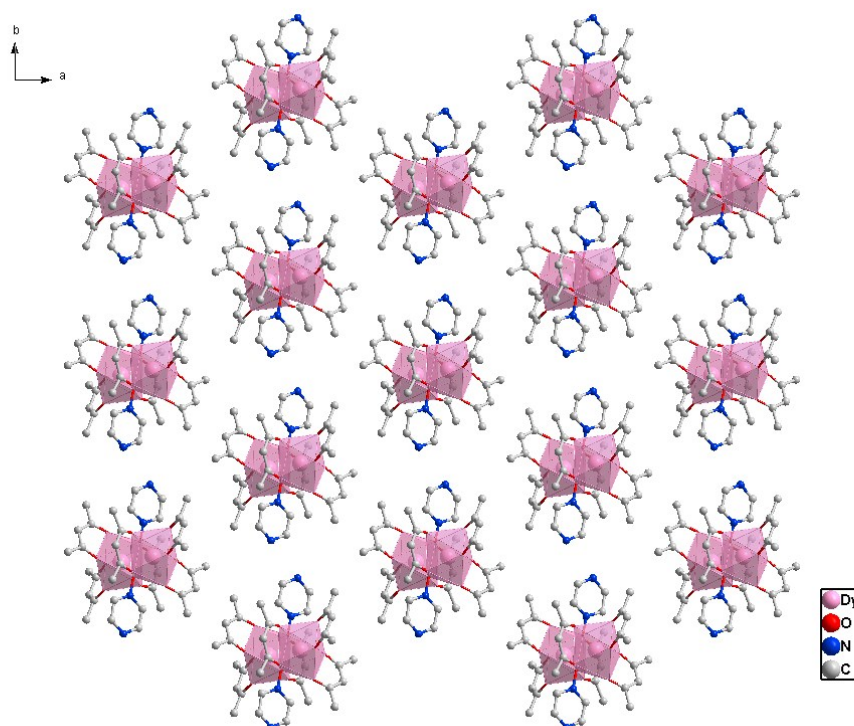

**Figure S3.** Packing diagram of complex **4** along *c* axis, all fluorine and hydrogen atoms are omitted for clarity.

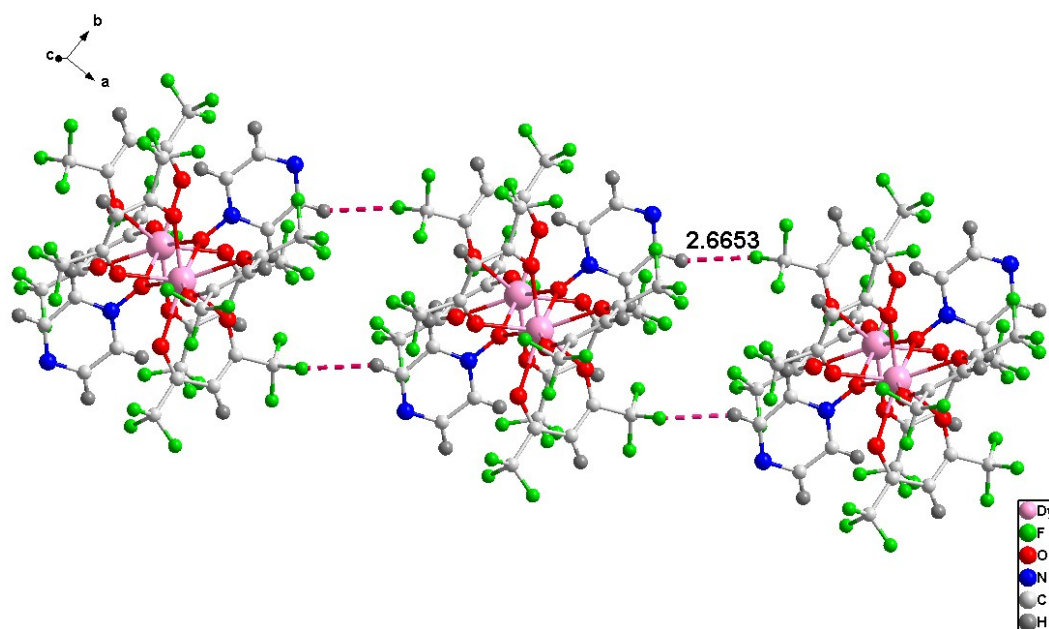

**Figure S4.** Hydrogen bonding interactions in complex **4** support the formation of one-dimensional chain arrangement.

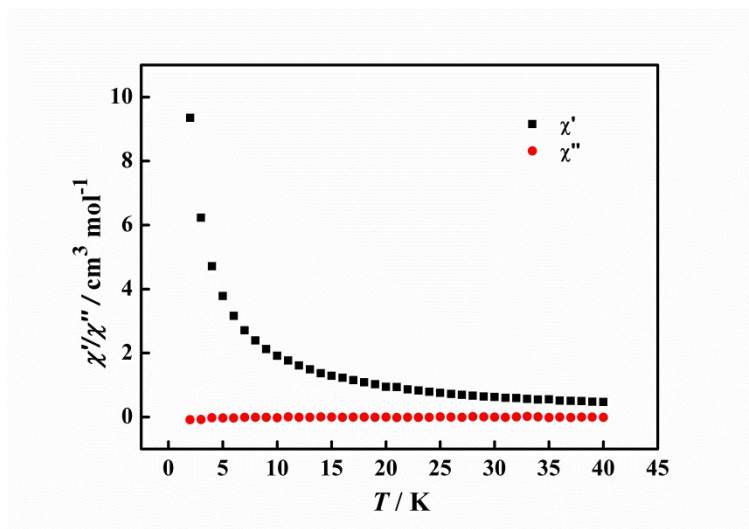

**Figure S5.** Temperature dependence of the in-phase and out-of-phase ac magnetic susceptibility for **1** in 1000 Hz under zero dc field.

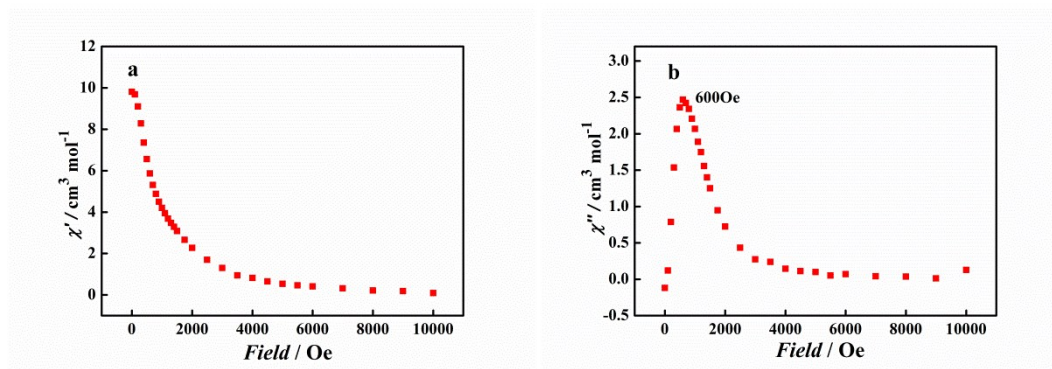

**Figure S6.** The field dependence of in-phase and out-of-phase ac magnetic susceptibilities of complex **1** at 1.9 K, 997 Hz.

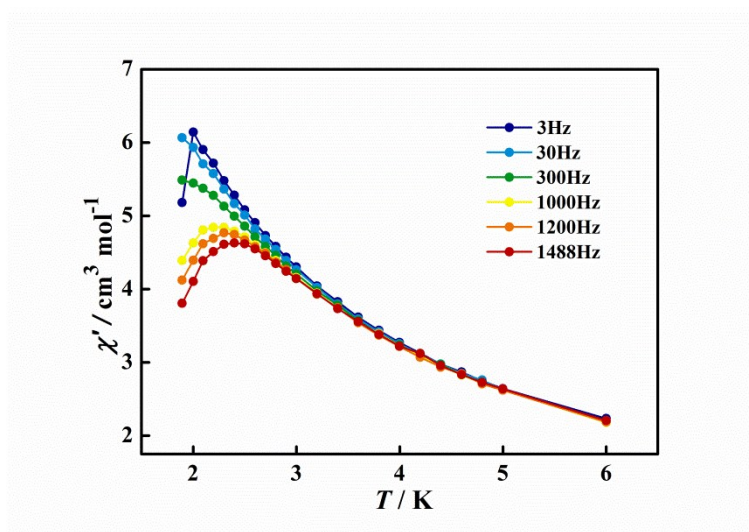

**Figure S7.** Temperature dependence of the in-phase (a) ac susceptibilities for **1** measured under 600 Oe dc field, the solid lines are a guide for the eyes.



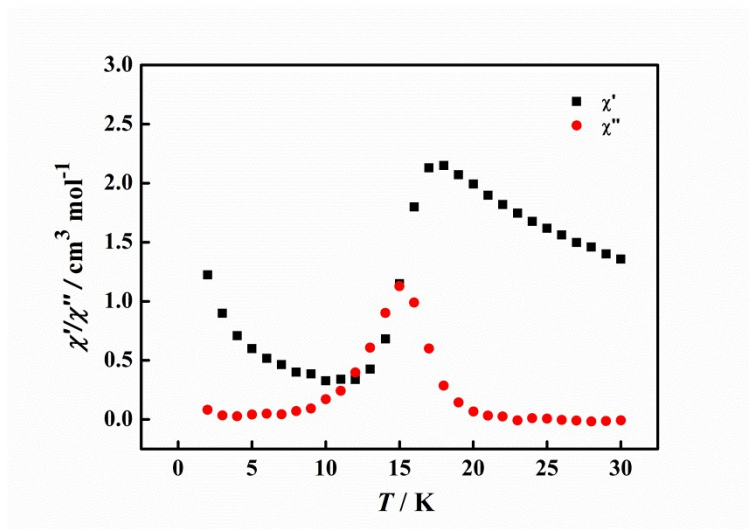

**Figure S8.** Temperature dependence of the in-phase and out-of-phase ac magnetic susceptibilities for complex **4** in 1000 Hz under zero dc field.

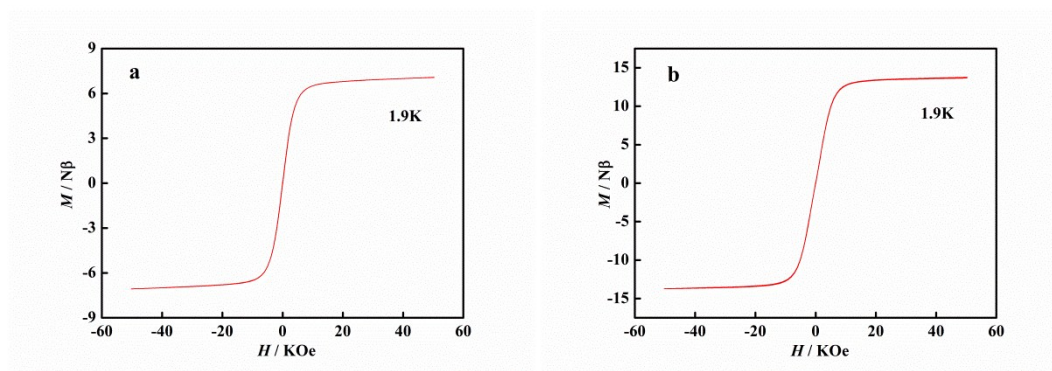

**Figure S9.** Magnetization curve versus applied field measured at 1.9 K for complex **1** (a) and **4** (b). It did not exhibit a hysteresis effect under our experimental conditions.

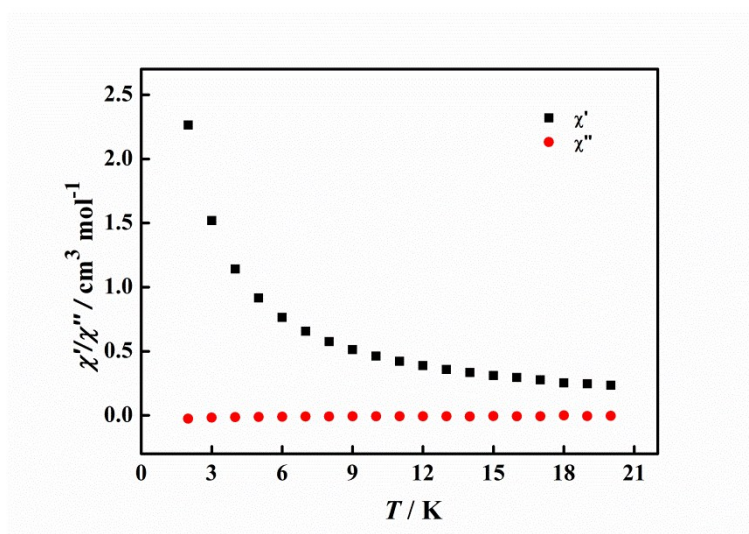

**Figure S10.** Temperature dependence of the in-phase and out-of-phase ac magnetic susceptibility for complex **2** in 800 Hz under zero dc field.

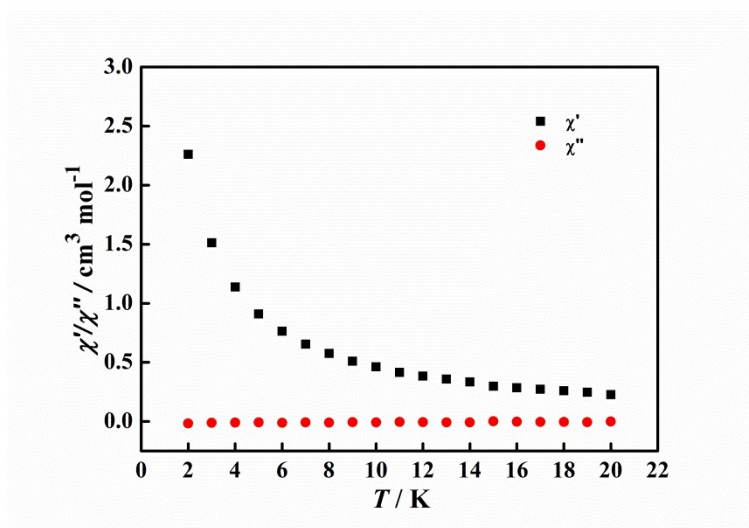

**Figure S11.** Temperature dependence of the in-phase and out-of-phase ac magnetic susceptibility for complex **3** in 800 Hz under zero dc field.

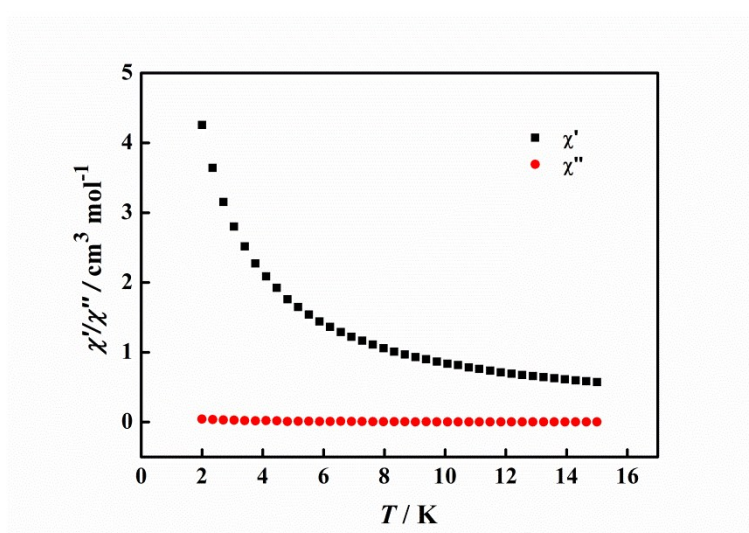

**Figure S12.** Temperature dependence of the in-phase and out-of-phase ac magnetic susceptibility for complex **5** in 1000 Hz under zero dc field.

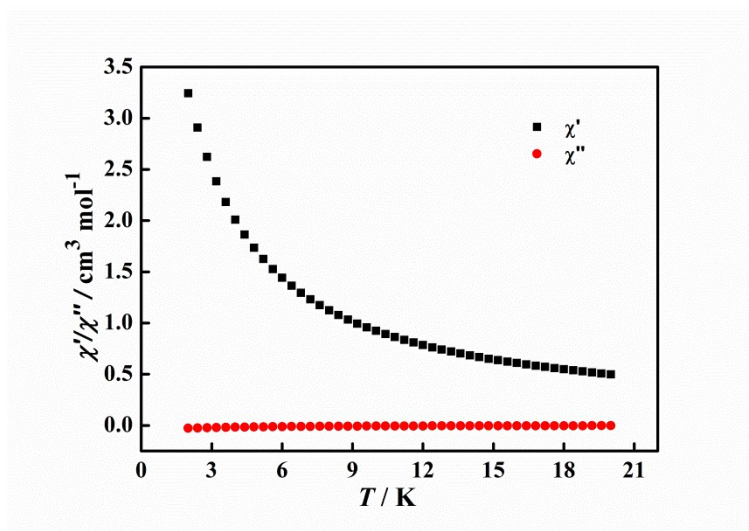

**Figure S13.** Temperature dependence of the in-phase and out-of-phase ac magnetic susceptibility for complex **6** in 800 Hz under zero dc field.

**Table S1.** Six complexes of Ln<sup>III</sup> ion geometry analysis by SHAPE software.

| Ln <sup>III</sup> complexes | $D_{2d}$ - TDD | $D_{4d}$ - SAPR | $C_{2v}$ - BTPR |
|-----------------------------|----------------|-----------------|-----------------|
| <b>1</b>                    | 1.245          | 1.972           | 2.815           |
| <b>2</b>                    | 0.531          | 1.364           | 1.821           |
| <b>3</b>                    | 0.480          | 1.587           | 1.754           |
| <b>4</b>                    | 0.904          | 1.014           | 1.987           |
| <b>5</b>                    | 0.928          | 1.005           | 2.074           |
| <b>6</b>                    | 1.158          | 0.795           | 2.109           |

**Table S2.** Selected bond lengths [ $\text{\AA}$ ] and angles [ $^\circ$ ] for complex **1**

| Bond lengths     |            |                  |            |
|------------------|------------|------------------|------------|
| Dy(1)-O(4)       | 2.179(3)   | Dy(1)-O(7)       | 2.250(3)   |
| Dy(1)-O(8)       | 2.296(3)   | Dy(1)-O(2)       | 2.343(3)   |
| Dy(1)-O(1)       | 2.410(3)   | Dy(1)-O(3)       | 2.458(3)   |
| Dy(1)-O(6)       | 2.458(3)   | Dy(1)-O(5)       | 2.544(3)   |
| Bond angles      |            |                  |            |
| O(4)-Dy(1)-O(7)  | 116.32(13) | O(4)-Dy(1)-O(8)  | 137.59(11) |
| O(7)-Dy(1)-O(8)  | 83.75(11)  | O(4)-Dy(1)-O(2)  | 80.39(12)  |
| O(7)-Dy(1)-O(2)  | 146.85(11) | O(8)-Dy(1)-O(2)  | 103.18(11) |
| O(4)-Dy(1)-O(1)  | 131.80(9)  | O(7)-Dy(1)-O(1)  | 83.67(11)  |
| O(8)-Dy(1)-O(1)  | 84.71(9)   | O(2)-Dy(1)-O(1)  | 65.11(11)  |
| O(4)-Dy(1)-O(3)  | 75.28(12)  | O(7)-Dy(1)-O(3)  | 129.96(10) |
| O(8)-Dy(1)-O(3)  | 64.03(11)  | O(2)-Dy(1)-O(3)  | 80.50(10)  |
| O(1)-Dy(1)-O(3)  | 126.56(11) | O(4)-Dy(1)-O(6)  | 72.05(13)  |
| O(7)-Dy(1)-O(6)  | 69.35(11)  | O(8)-Dy(1)-O(6)  | 148.27(12) |
| O(2)-Dy(1)-O(6)  | 91.51(10)  | O(1)-Dy(1)-O(6)  | 76.13(12)  |
| O(3)-Dy(1)-O(6)  | 147.22(12) | O(4)-Dy(1)-O(5)  | 71.31(10)  |
| O(7)-Dy(1)-O(5)  | 70.11(12)  | O(8)-Dy(1)-O(5)  | 82.97(10)  |
| O(2)-Dy(1)-O(5)  | 142.39(11) | O(1)-Dy(1)-O(5)  | 152.03(10) |
| O(3)-Dy(1)-O(5)  | 68.87(11)  | O(6)-Dy(1)-O(5)  | 102.41(11) |
| N(1)-O(1)-Dy(1)  | 123.7(2)   | C(7)-O(2)-Dy(1)  | 126.4(3)   |
| C(9)-O(3)-Dy(1)  | 126.9(3)   | C(12)-O(4)-Dy(1) | 129.9(3)   |
| C(14)-O(5)-Dy(1) | 139.1(3)   | C(17)-O(6)-Dy(1) | 130.6(3)   |
| C(19)-O(7)-Dy(1) | 135.3(3)   | N(2)-O(8)-Dy(1)  | 121.0(3)   |



**Table S3.** Selected bond lengths [Å] and angles [°] for complex **2**

| Bond lengths     |          |                  |          |
|------------------|----------|------------------|----------|
| Tb(1)-O(8)       | 2.336(8) | Tb(1)-O(3)       | 2.345(8) |
| Tb(1)-O(6)       | 2.362(8) | Tb(1)-O(7)       | 2.373(8) |
| Tb(1)-O(2)       | 2.374(9) | Tb(1)-O(5)       | 2.374(8) |
| Tb(1)-O(1)       | 2.380(8) | Tb(1)-O(4)       | 2.394(8) |
| Bond angles      |          |                  |          |
| O(8)-Tb(1)-O(3)  | 149.5(3) | O(8)-Tb(1)-O(6)  | 72.1(3)  |
| O(3)-Tb(1)-O(6)  | 137.6(3) | O(8)-Tb(1)-O(7)  | 76.1(3)  |
| O(3)-Tb(1)-O(7)  | 86.6(3)  | O(6)-Tb(1)-O(7)  | 104.8(3) |
| O(8)-Tb(1)-O(2)  | 81.9(3)  | O(3)-Tb(1)-O(2)  | 99.9(3)  |
| O(6)-Tb(1)-O(2)  | 93.2(3)  | O(7)-Tb(1)-O(2)  | 145.3(3) |
| O(8)-Tb(1)-O(5)  | 123.0(3) | O(3)-Tb(1)-O(5)  | 72.6(3)  |
| O(6)-Tb(1)-O(5)  | 73.0(3)  | O(7)-Tb(1)-O(5)  | 71.2(3)  |
| O(2)-Tb(1)-O(5)  | 143.3(3) | O(8)-Tb(1)-O(1)  | 78.6(3)  |
| O(3)-Tb(1)-O(1)  | 73.2(3)  | O(6)-Tb(1)-O(1)  | 148.8(3) |
| O(7)-Tb(1)-O(1)  | 77.6(3)  | O(2)-Tb(1)-O(1)  | 71.9(3)  |
| O(5)-Tb(1)-O(1)  | 134.4(3) | O(8)-Tb(1)-O(4)  | 134.9(3) |
| O(3)-Tb(1)-O(4)  | 72.5(3)  | O(6)-Tb(1)-O(4)  | 74.2(3)  |
| O(7)-Tb(1)-O(4)  | 142.2(3) | O(2)-Tb(1)-O(4)  | 71.0(3)  |
| O(5)-Tb(1)-O(4)  | 72.6(3)  | O(1)-Tb(1)-O(4)  | 123.0(3) |
| C(4)-O(2)-Tb(1)  | 133.4(9) | C(2)-O(1)-Tb(1)  | 133.4(9) |
| C(7)-O(3)-Tb(1)  | 134.4(8) | C(14)-O(6)-Tb(1) | 133.2(9) |
| C(12)-O(5)-Tb(1) | 131.8(9) | C(9)-O(4)-Tb(1)  | 132.3(8) |
| N(2)-O(8)-Tb(1)  | 130.8(6) | N(1)-O(7)-Tb(1)  | 120.4(6) |

**Table S4.** Selected bond lengths [Å] and angles [°] for complex **3**

| Bond lengths     |            |                  |            |
|------------------|------------|------------------|------------|
| Ho(1)-O(8)       | 2.319(4)   | Ho(1)-O(6)       | 2.338(4)   |
| Ho(1)-O(3)       | 2.339(5)   | Ho(1)-O(2)       | 2.341(4)   |
| Ho(1)-O(7)       | 2.343(4)   | Ho(1)-O(5)       | 2.365(4)   |
| Ho(1)-O(4)       | 2.380(5)   | Ho(1)-O(1)       | 2.389(4)   |
| Bond angles      |            |                  |            |
| O(8)-Ho(1)-O(6)  | 73.37(15)  | O(8)-Ho(1)-O(3)  | 147.35(16) |
| O(6)-Ho(1)-O(3)  | 138.92(17) | O(8)-Ho(1)-O(2)  | 83.00(17)  |
| O(6)-Ho(1)-O(2)  | 94.06(17)  | O(3)-Ho(1)-O(2)  | 96.36(17)  |
| O(8)-Ho(1)-O(7)  | 75.31(14)  | O(6)-Ho(1)-O(7)  | 104.45(16) |
| O(3)-Ho(1)-O(7)  | 88.39(15)  | O(2)-Ho(1)-O(7)  | 145.77(17) |
| O(8)-Ho(1)-O(5)  | 124.21(17) | O(6)-Ho(1)-O(5)  | 73.29(17)  |
| O(3)-Ho(1)-O(5)  | 74.38(19)  | O(2)-Ho(1)-O(5)  | 142.43(19) |
| O(7)-Ho(1)-O(5)  | 71.43(16)  | O(8)-Ho(1)-O(4)  | 135.55(15) |
| O(6)-Ho(1)-O(4)  | 74.48(17)  | O(3)-Ho(1)-O(4)  | 72.32(17)  |
| O(2)-Ho(1)-O(4)  | 69.53(18)  | O(7)-Ho(1)-O(4)  | 142.95(16) |
| O(5)-Ho(1)-O(4)  | 72.99(18)  | O(8)-Ho(1)-O(1)  | 78.24(16)  |
| O(6)-Ho(1)-O(1)  | 149.55(16) | O(3)-Ho(1)-O(1)  | 70.76(17)  |
| O(2)-Ho(1)-O(1)  | 71.49(17)  | O(7)-Ho(1)-O(1)  | 78.31(16)  |
| O(5)-Ho(1)-O(1)  | 133.89(16) | O(4)-Ho(1)-O(1)  | 121.61(16) |
| C(4)-O(2)-Ho(1)  | 131.9(5)   | C(2)-O(1)-Ho(1)  | 131.8(5)   |
| C(7)-O(3)-Ho(1)  | 134.5(5)   | C(14)-O(6)-Ho(1) | 132.2(5)   |
| C(12)-O(5)-Ho(1) | 131.2(5)   | C(9)-O(4)-Ho(1)  | 133.6(5)   |
| N(2)-O(8)-Ho(1)  | 126.1(3)   | N(1)-O(7)-Ho(1)  | 122.8(3)   |

**Table S5.** Selected bond lengths [Å] and angles [°] for complex 4

| Bond lengths     |            |                   |            |
|------------------|------------|-------------------|------------|
| Dy(1)-O(1)       | 2.280(4)   | Dy(1)-O(3)        | 2.307(4)   |
| Dy(1)-O(4)       | 2.309(4)   | Dy(1)-O(6)        | 2.311(4)   |
| Dy(1)-O(5)       | 2.318(4)   | Dy(1)-O(2)        | 2.329(3)   |
| Dy(1)-O(7)       | 2.405(3)   | Dy(1)-O(7)A       | 2.417(3)   |
| Bond angles      |            |                   |            |
| O(1)-Dy(1)-O(3)  | 87.04(16)  | O(1)-Dy(1)-O(4)   | 77.58(15)  |
| O(3)-Dy(1)-O(4)  | 71.85(15)  | O(1)-Dy(1)-O(6)   | 105.42(16) |
| O(3)-Dy(1)-O(6)  | 139.51(15) | O(4)-Dy(1)-O(6)   | 147.92(15) |
| O(1)-Dy(1)-O(5)  | 74.49(14)  | O(3)-Dy(1)-O(5)   | 147.30(16) |
| O(4)-Dy(1)-O(5)  | 77.87(15)  | O(6)-Dy(1)-O(5)   | 72.49(14)  |
| O(1)-Dy(1)-O(2)  | 73.11(14)  | O(3)-Dy(1)-O(2)   | 73.98(14)  |
| O(4)-Dy(1)-O(2)  | 135.57(15) | O(6)-Dy(1)-O(2)   | 73.31(13)  |
| O(5)-Dy(1)-O(2)  | 123.54(14) | O(1)-Dy(1)-O(7)   | 146.27(13) |
| O(3)-Dy(1)-O(7)  | 105.22(13) | O(4)-Dy(1)-O(7)   | 76.78(14)  |
| O(6)-Dy(1)-O(7)  | 85.67(13)  | O(5)-Dy(1)-O(7)   | 79.00(13)  |
| O(2)-Dy(1)-O(7)  | 140.22(13) | O(1)-Dy(1)-O(7)A  | 150.11(12) |
| O(3)-Dy(1)-O(7)A | 74.99(15)  | O(4)-Dy(1)-O(7)A  | 117.51(13) |
| O(6)-Dy(1)-O(7)A | 75.92(14)  | O(5)-Dy(1)-O(7)A  | 131.81(14) |
| O(2)-Dy(1)-O(7)A | 78.99(12)  | O(7)-Dy(1)-O(7)A  | 63.07(13)  |
| C(2)-O(1)-Dy(1)  | 136.1(4)   | C(4)-O(2)-Dy(1)   | 133.6(4)   |
| C(7)-O(3)-Dy(1)  | 133.5(5)   | C(9)-O(4)-Dy(1)   | 133.1(5)   |
| C(12)-O(5)-Dy(1) | 134.4(4)   | C(14)-O(6)-Dy(1)  | 134.8(4)   |
| N(1)-O(7)-Dy(1)  | 122.5(3)   | Dy(1)-O(7)-Dy(1)A | 116.93(13) |

**Table S6.** Selected bond lengths [Å] and angles [°] for complex **5**

| Bond lengths     |          |                   |          |
|------------------|----------|-------------------|----------|
| Tb(1)-O(1)       | 2.301(7) | Tb(1)-O(4)        | 2.335(6) |
| Tb(1)-O(3)       | 2.340(6) | Tb(1)-O(6)        | 2.355(7) |
| Tb(1)-O(5)       | 2.357(6) | Tb(1)-O(2)        | 2.376(6) |
| Tb(1)-O(7)       | 2.439(6) | Tb(1)-O(7)A       | 2.431(6) |
| Bond angles      |          |                   |          |
| O(1)-Tb(1)-O(4)  | 77.8(2)  | O(1)-Tb(1)-O(3)   | 86.5(2)  |
| O(4)-Tb(1)-O(3)  | 71.5(2)  | O(1)-Tb(1)-O(6)   | 106.0(2) |
| O(4)-Tb(1)-O(6)  | 148.2(2) | O(3)-Tb(1)-O(6)   | 139.4(2) |
| O(1)-Tb(1)-O(5)  | 75.6(2)  | O(4)-Tb(1)-O(5)   | 79.1(2)  |
| O(3)-Tb(1)-O(5)  | 148.3(2) | O(6)-Tb(1)-O(5)   | 71.7(2)  |
| O(1)-Tb(1)-O(2)  | 72.5(2)  | O(4)-Tb(1)-O(2)   | 135.1(2) |
| O(3)-Tb(1)-O(2)  | 73.8(2)  | O(6)-Tb(1)-O(2)   | 73.7(2)  |
| O(5)-Tb(1)-O(2)  | 123.2(2) | O(1)-Tb(1)-O(7)A  | 149.3(2) |
| O(4)-Tb(1)-O(7)A | 117.2(2) | O(3)-Tb(1)-O(7)A  | 74.7(2)  |
| O(6)-Tb(1)-O(7)A | 75.9(2)  | O(5)-Tb(1)-O(7)A  | 131.4(2) |
| O(2)-Tb(1)-O(7)A | 79.0(2)  | O(1)-Tb(1)-O(7)   | 147.0(2) |
| O(4)-Tb(1)-O(7)  | 77.0(2)  | O(3)-Tb(1)-O(7)   | 105.1(2) |
| O(6)-Tb(1)-O(7)  | 85.3(2)  | O(5)-Tb(1)-O(7)   | 78.9(2)  |
| O(2)-Tb(1)-O(7)  | 140.2(2) | O(7)A-Tb(1)-O(7)  | 63.1(2)  |
| C(2)-O(1)-Tb(1)  | 136.2(7) | C(4)-O(2)-Tb(1)   | 134.1(6) |
| C(7)-O(3)-Tb(1)  | 133.0(8) | C(9)-O(4)-Tb(1)   | 132.6(8) |
| C(12)-O(5)-Tb(1) | 135.0(7) | C(14)-O(6)-Tb(1)  | 134.7(7) |
| N(1)-O(7)-Tb(1)  | 121.9(5) | Tb(1)A-O(7)-Tb(1) | 116.9(2) |

**Table S7.** Selected bond lengths [Å] and angles [°] for complex **6**

| Bond lengths     |            |                   |            |
|------------------|------------|-------------------|------------|
| Ho(1)-O(1)       | 2.286(2)   | Ho(1)-O(4)        | 2.3090(19) |
| Ho(1)-O(2)       | 2.3236(18) | Ho(1)-O(3)        | 2.3241(18) |
| Ho(1)-O(5)       | 2.3260(19) | Ho(1)-O(6)        | 2.329(2)   |
| Ho(1)-O(7)       | 2.3939(18) | Ho(1)-O(7)A       | 2.3921(18) |
| Bond angles      |            |                   |            |
| O(1)-Ho(1)-O(4)  | 77.80(7)   | O(1)-Ho(1)-O(2)   | 73.73(7)   |
| O(4)-Ho(1)-O(2)  | 136.71(7)  | O(1)-Ho(1)-O(3)   | 85.07(7)   |
| O(4)-Ho(1)-O(3)  | 72.21(7)   | O(2)-Ho(1)-O(3)   | 73.46(7)   |
| O(1)-Ho(1)-O(5)  | 75.33(7)   | O(4)-Ho(1)-O(5)   | 78.87(7)   |
| O(2)-Ho(1)-O(5)  | 122.94(7)  | O(3)-Ho(1)-O(5)   | 147.90(7)  |
| O(1)-Ho(1)-O(4)  | 77.80(7)   | O(1)-Ho(1)-O(2)   | 73.73(7)   |
| O(4)-Ho(1)-O(2)  | 136.71(7)  | O(1)-Ho(1)-O(3)   | 85.07(7)   |
| O(4)-Ho(1)-O(3)  | 72.21(7)   | O(2)-Ho(1)-O(3)   | 73.46(7)   |
| O(1)-Ho(1)-O(5)  | 75.33(7)   | O(4)-Ho(1)-O(5)   | 78.87(7)   |
| O(2)-Ho(1)-O(5)  | 122.94(7)  | O(3)-Ho(1)-O(5)   | 147.90(7)  |
| O(1)-Ho(1)-O(4)  | 77.80(7)   | O(1)-Ho(1)-O(2)   | 73.73(7)   |
| O(4)-Ho(1)-O(7)  | 76.19(6)   | O(2)-Ho(1)-O(7)   | 139.34(6)  |
| O(3)-Ho(1)-O(7)  | 106.21(7)  | O(5)-Ho(1)-O(7)   | 79.45(6)   |
| O(6)-Ho(1)-O(7)  | 84.26(7)   | O(7)A-Ho(1)-O(7)  | 62.85(7)   |
| C(2)-O(1)-Ho(1)  | 134.97(18) | C(4)-O(2)-Ho(1)   | 133.41(17) |
| C(7)-O(3)-Ho(1)  | 133.44(18) | C(9)-O(4)-Ho(1)   | 133.21(19) |
| C(12)-O(5)-Ho(1) | 134.42(18) | C(14)-O(6)-Ho(1)  | 134.33(19) |
| N(1)-O(7)-Ho(1)  | 121.56(14) | Ho(1)A-O(7)-Ho(1) | 117.15(7)  |



**Table S8.** The structures and magnetic parameters for selected dinuclear Dy-SMMs with magnetic interactions.

| Complex                                                                                            | $J_{\text{Dy-Dy}}$ (cm <sup>-1</sup> ) | $U_{\text{eff}}$ / K | Ref.      |
|----------------------------------------------------------------------------------------------------|----------------------------------------|----------------------|-----------|
| [Dy( $\mu$ -OH)(DBP) <sub>2</sub> (THF)] <sub>2</sub>                                              | -4.6                                   | 721                  | 3c        |
| [Dy(Cy <sub>2</sub> N) <sub>2</sub> ( $\mu$ -Cl)(THF)] <sub>2</sub>                                | -0.83                                  | 624                  | 8d        |
| [Ln(hfac) <sub>3</sub> (PzNO)] <sub>2</sub>                                                        | -2.36                                  | 226.7                | This work |
| [Dy(hfac) <sub>3</sub> (PyNO)] <sub>2</sub>                                                        | -2.46                                  | 167                  | 17c       |
| Dy <sub>2</sub> (HL <sub>1</sub> ) <sub>2</sub> (NO <sub>3</sub> ) <sub>2</sub> (DMF) <sub>4</sub> | 9.69                                   | 155                  | 8g        |
| Dy <sub>2</sub> (L <sub>2</sub> ) <sub>2</sub> (NO <sub>3</sub> ) <sub>2</sub> (MeOH) <sub>2</sub> | 5.09                                   | 90.9                 | 21b       |
| [Dy <sub>2</sub> (opch) <sub>2</sub> ( $\mu$ -Cl)Cl(MeOH) <sub>2</sub> ]                           | 4.36                                   | 89                   | 8d        |
| [DyL <sub>4</sub> ClCH <sub>3</sub> OH] <sub>2</sub>                                               | 3.82                                   | 88.4                 | 8e        |
| [{Dy(tta) <sub>3</sub> (L <sub>3</sub> ) <sub>2</sub> }] • 0.5CH <sub>2</sub> Cl <sub>2</sub>      | -2.30                                  | 87                   | 16a       |
| [Dy <sub>2</sub> (L <sub>5</sub> ) <sub>2</sub> (DBM) <sub>2</sub> (DMA) <sub>2</sub> ] • 2DMA     | -5.78                                  | 77                   | 21c       |

DBP=2,6-di-*tert*-butylphenolate; PzNO=pyrazine-*N*-oxide; PyNO=pyridine-*N*-oxide; HL<sub>1</sub>=3-hydroxy-*N'*-(2-hydroxy-3-methoxybenzylidene)picolinohydrazide; L<sub>2</sub>=2-(((2-hydroxybenzylidene)amino)methyl)-6-methoxyphenol); opch=(*E*)-*N'*-(2-hydroxy-3-methoxybenzylidene)pyrazine-2-carbohydrazide; tta=2-thenoyltrifluoroacetate; L<sub>3</sub>=tetrathiafulvalene-3-pyridine-*N*-oxide, L<sub>4</sub>=*N'*-(2-hydroxybenzylidene)picolinohydrazide; HDBM=dibenzoyl-methane; H<sub>2</sub>L<sub>5</sub>=2-hydroxy-*N'*-(2-hydroxy-3-methoxybenzylidene)benzohydrazide;
